# Supplementary material for: A Nanobody/Monoclonal Antibody “hybrid” sandwich technology offers an improved immunoassay strategy for detection of African trypanosome infections
Source: PubMed Central journal article supplement (PMC11244815; doi:10.1371/journal.pntd.0012294), 2024-07-01

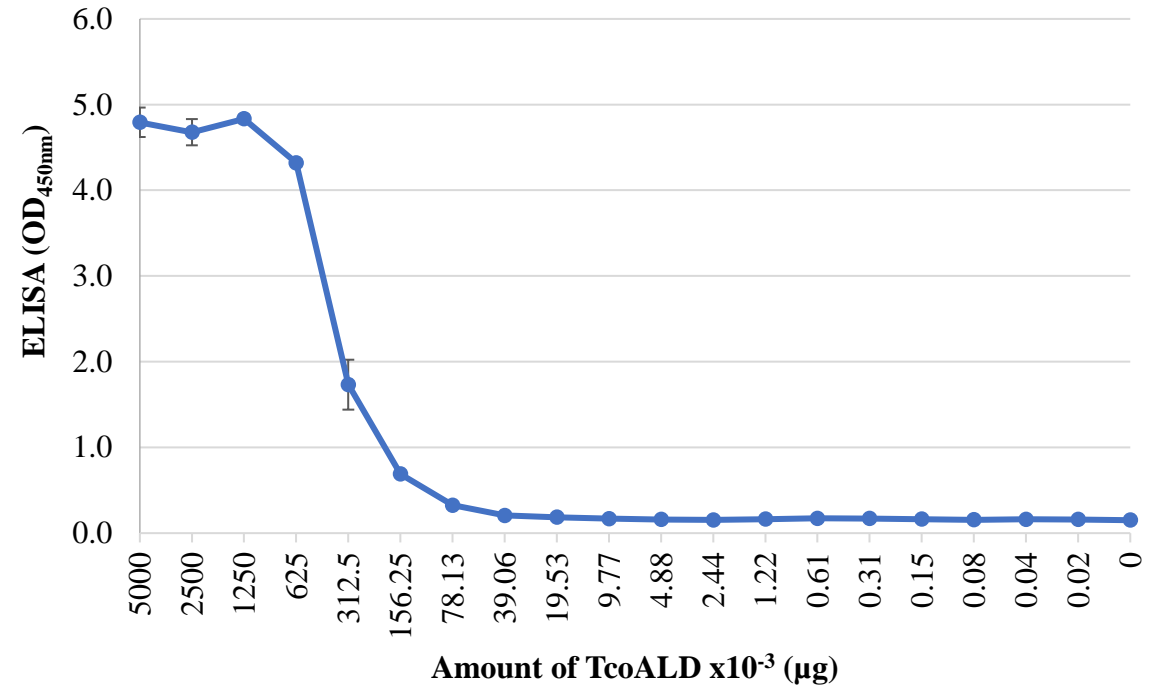

Supplement: pntd.0012294.s006.pdf [file pntd.0012294.s006.pdf]
